# Supplementary material for: Load-resistance analysis: An alternative approach to tsunami damage assessment applied to the 2011 Great East Japan tsunami
Source: Copernicus journal article supplement (doi:10.5194/nhess-2019-71), 2019-03-28
Supplement: Supplementary file [file nhess-2019-71-AC1-supplement.pdf]

We highly appreciate the time spent for the review comments from the reviewer especially those minor corrections (our typo errors) and pointed out many points that clarifications are needed. We are happy that the reviewer is happy and highly evaluated our manuscript. Please find our responses and corrections as shown below.

| Reviewer comments                                                                                                                                                                                             | Our answers                                                                                                                                      | Corrected manuscript                                                                                                                                                  |
|---------------------------------------------------------------------------------------------------------------------------------------------------------------------------------------------------------------|--------------------------------------------------------------------------------------------------------------------------------------------------|-----------------------------------------------------------------------------------------------------------------------------------------------------------------------|
| - Page 3 Line 119: "...examined in Latcherote et al (2016).                                                                                                                                                   | Corrected                                                                                                                                        | ... examined in Latcherote et al. (2016).                                                                                                                             |
| - Page 3 Line 124: "... refers to the rotation of a building about its foundation..." Do you mean "around its foundation?"                                                                                    | Corrected                                                                                                                                        | ...a building <b>around</b> its foundation...                                                                                                                         |
| - Page 4 Figure 1: It is better to write the definition of forces, i.e. W, R, etc in figure's caption.                                                                                                        | Explanations are added in the caption                                                                                                            | The forces denoted are as follows, $F_h$ = hydrodynamic force, $F_d$ = debris impact force, $R$ = lateral resistance, $W$ = building weight and $B$ = buoyancy force. |
| - Page 5 Figure 3: Better to write (with the courtesy of ...) as a reference for the photos                                                                                                                   | Explanations are added in the caption                                                                                                            | ...(courtesy of MLIT, 2012).                                                                                                                                          |
| - Page 5 Line 194: Is the Manning's roughness coefficients used as a spatial distribution depending on different type of buildings in study area or just constant values for a specific area? Please clarify. | We used a constant value of Manning coefficient in regions 1-5. For region 6, we used specific value depending on land use and building density. | A constant value of Manning coefficient was applied to all computational grids except at the finest resolution (Region 6)...                                          |
| - Page 5 Line 195: There is extra space between words "land" and "use"                                                                                                                                        | The space is added.                                                                                                                              | ...according to <b>land use</b> types...                                                                                                                              |
| - Page 5 Line 197: better to identify that "at the time of occurrence in 2011"                                                                                                                                | Explanations are added                                                                                                                           | ...tsunami occurrence <b>in 2011</b> and simulation...                                                                                                                |
| - Page 5 Line 198: better to use ";" or "and" instead of "," between sentences.                                                                                                                               | Corrected                                                                                                                                        | ...deformation <b>and</b> the fault...                                                                                                                                |
| - Page 6 Figure 4: In the legend of figure, T.P. is not clear.                                                                                                                                                | Corrected. Explanations are added in the caption.                                                                                                | Please see the corrected Fig. 4 <b>Projection of bathymetry and topography data is the Japanese Geodetic Datum 2000 and the Tokyo Peil (T.P.) datum.</b>              |
| - Page 7 Figure 5: T.P. in the legends is not clear. Also, the color boxes in the legend were shifted. Better to reposition.                                                                                  | Corrected                                                                                                                                        | Please see the corrected Fig. 5                                                                                                                                       |
| - Page 7 Figure 6: In the legend of figure, T.P. is not clear.                                                                                                                                                | Corrected                                                                                                                                        | Please see the corrected Fig. 6                                                                                                                                       |
| - Page 7 Line 228: I think it should be "through" instead of "though"                                                                                                                                         | Corrected                                                                                                                                        | ... <b>through</b> drag formula...                                                                                                                                    |
| - Page 7 Line 237: Better to write a short explanation about why you used $CD=1.5$                                                                                                                            | Explanations are added                                                                                                                           | ( $C_D = 1.5$ as an average value from 1.25 to 2.00 depending on the width to depth ratio, FEMA, 2003),                                                               |
| - Page 7 Line 238: What is the                                                                                                                                                                                | From FEMA                                                                                                                                        | (= 0.7 sec for wooden wall, FEMA, 2003)                                                                                                                               |

|                                                                                                                                                                                                                                                                                             |                                                                                                                                                                                                                                        |                                                                                                                                                                                                                                                                                                                  |
|---------------------------------------------------------------------------------------------------------------------------------------------------------------------------------------------------------------------------------------------------------------------------------------------|----------------------------------------------------------------------------------------------------------------------------------------------------------------------------------------------------------------------------------------|------------------------------------------------------------------------------------------------------------------------------------------------------------------------------------------------------------------------------------------------------------------------------------------------------------------|
| reference for using $dt=0.7$ sec for wooden wall? Please specify.                                                                                                                                                                                                                           |                                                                                                                                                                                                                                        |                                                                                                                                                                                                                                                                                                                  |
| - Page 8 Line 272: How do you assume 3.5m,2.7m,2.1m for height of buildings in each floor? Please give reference or at least make a short explanation. Because these values are so specific.                                                                                                | They are average floor heights of wooden houses from an interview with local housing construction company.                                                                                                                             | ...an anonymous interview was conducted with a local housing construction company. The estimates provided for the heights of the first, second and third floors of an average wooden housing were 3.5 m, 2.7 m and 2.1 m respectively, which were then used as the average values for the purpose of this study. |
| - Page 9 Figure 7: What is the reference for these design coefficients? Also it is confusing to see A, B without having any prior explanation. We understand their meaning only after seeing Figure 8. I think better to change the order of these figures. Besides, cm/50 m2 is confusing. | These coefficients are also from MLIT (2018). We have also moved Fig. 8 after Example 2 to avoid such confusion. Cm/50 m2 is a wrong typing.                                                                                           | Please see Fig. 7 and Example 2                                                                                                                                                                                                                                                                                  |
| - Page 10 Line 340: I think they should be “Table 1 and 2” instead of “Table 3 and 4”                                                                                                                                                                                                       | Corrected                                                                                                                                                                                                                              | Tables 1 and 2 highlight...                                                                                                                                                                                                                                                                                      |
| - Page 11 Line 342: I think it should be “Table 2” instead of “Table 4”.                                                                                                                                                                                                                    | Corrected                                                                                                                                                                                                                              | ... Table 2 and illustrated in Fig. 9.                                                                                                                                                                                                                                                                           |
| - Page 12 Line 365: “...for major damage is 9.7-17.6 kN/m....”                                                                                                                                                                                                                              | Corrected                                                                                                                                                                                                                              | ...major damage is 9.7 – 17.6 kN/m....                                                                                                                                                                                                                                                                           |
| - Page 13 Figure 10: This figure needs further explanation, especially in the caption. Are they observed or calculated values; it is not clear. Also, better to reposition color boxes in color legend (shifted).                                                                           | Corrected. Explanations are added in the caption. Color boxes are also correct.                                                                                                                                                        | Please see Fig. 10.<br>...the simulated critical flow depth (left) and the simulated maximum flow depth...                                                                                                                                                                                                       |
| - Page 14 Figure 13: The label “Depth/max/ depth” in color legend is confusing. Maybe better to write “critical vs max depth ratio” instead.                                                                                                                                                | Corrected                                                                                                                                                                                                                              | Please see Fig. 13.                                                                                                                                                                                                                                                                                              |
| - Page 14 Table 4: Is there any mistake in the last column? Because in the p values footnote at the bottom there is explanation for ** and * but all values in last column are ***.                                                                                                         | We agreed with the reviewer that as there is only one type of p value, we have corrected accordingly.                                                                                                                                  | p value: * < 0.001                                                                                                                                                                                                                                                                                               |
| - Page 14 Figure 14: (i) I think there is a mistake in color legend and caption. Explanation of Green in legend should be “Obs. No collapse and Stat. no collapse”. (ii) In figure caption it is better to write “(left)” and “(right)” instead of 1) and 2). (iii) in the caption it       | We are sorry for our mistake both in the figures and captions. All is corrected now. We also added a text box in each figure to clearly mention that this is a comparison of our proposed method and the original fragility functions. | Please see Fig. 14.                                                                                                                                                                                                                                                                                              |

|                                                                                                                                                                                                                                                                                                                                                                                                                                                                                              |                                                                                                                                                                                                                                                                                                                                 |                                                                                                                                             |
|----------------------------------------------------------------------------------------------------------------------------------------------------------------------------------------------------------------------------------------------------------------------------------------------------------------------------------------------------------------------------------------------------------------------------------------------------------------------------------------------|---------------------------------------------------------------------------------------------------------------------------------------------------------------------------------------------------------------------------------------------------------------------------------------------------------------------------------|---------------------------------------------------------------------------------------------------------------------------------------------|
| <p>should be “Blue: Correct reproduction of collapsed buildings” instead of Green:.... and “Green: Correct reproduction of non-collapsed buildings” instead of Blue:... (iv) it is better to write a title on each plot, i.e. “proposed method” for the left and “fragility curves” for the right one.</p>                                                                                                                                                                                   |                                                                                                                                                                                                                                                                                                                                 |                                                                                                                                             |
| <p>- Page 16 Section 3.5: I think this section is a bit confusing in total. First of all it is not clear how you assign 25%, 50%, 75% damage ratios. Then conversion of replacement ratios in next page on Table 6 is not clear as well. Please clarify this calculation.</p>                                                                                                                                                                                                                | <p>The 25%, 50%, 75% damage ratios were interpreted from MLIT’s damage definition. For this, Table 6 (Former Table 7) is modified. Table 7 is newly added to summarize the assigned ratio to each structural component. In addition, calculation example of the replacement cost ratio for each damage level is also added.</p> | <p>Please see the revised section 3.5.</p>                                                                                                  |
| <p>- Page 17 Line 517: Related with the previous suggestion, this part is not clear “to combine building damage estimations and financial losses”. Further explanation is needed.</p>                                                                                                                                                                                                                                                                                                        | <p>We have modified this sentence.</p>                                                                                                                                                                                                                                                                                          | <p>...first attempt to <b>propose both</b> building damage estimations and financial losses.</p>                                            |
| <p>- Page 18 Line 522: Please delete “and”</p>                                                                                                                                                                                                                                                                                                                                                                                                                                               | <p>Corrected</p>                                                                                                                                                                                                                                                                                                                |                                                                                                                                             |
| <p>- Page 18 Section 4.2: I think this proposed method needs a name. Like “fragility curves” method or else, it would be good to give a name to this new proposed method for convenience in further studies and references. Also, if applicable, I think it is better to clearly remark that this proposed method can be used for wooden buildings located along other coastal regions of Japan. It would be good to specify this method would be applicable for other regions in Japan.</p> | <p>We have modified this sentence.</p>                                                                                                                                                                                                                                                                                          | <p>The newly proposed <b>load-resistance analytical</b> method can be applied to <b>other coastal regions of Japan and globally</b>,...</p> |
