# Supplementary material for: Load-resistance analysis: An alternative approach to tsunami damage assessment applied to the 2011 Great East Japan tsunami
Source: Copernicus journal article supplement (doi:10.5194/nhess-2019-71), 2019-03-28
Supplement: Supplementary file [file nhess-2019-71-AC2-supplement.pdf]

1 **Load-resistance analysis: An alternative approach to tsunami damage assessment applied**  
2 **to the 2011 Great East Japan tsunami**

3  
4 Anawat Suppasri<sup>1</sup>, Kwanchai Pakoksung<sup>1</sup>, Ingrid Charvet<sup>2</sup>, Constance Ting Chua<sup>3</sup>, Noriyuki  
5 Takahashi<sup>4</sup>, Teraphan Ornthammarath<sup>5</sup>, Panon Latcharote<sup>6</sup>, Natt Leelawat<sup>7</sup> and Fumihiko  
6 Imamura<sup>1</sup>

7  
8 <sup>1</sup>International Research Institute of Disaster Science, Tohoku University  
9 (468-1 Aramaki-aza Aoba, Aoba-ku, Sendai 980-0845, Japan)

10 <sup>2</sup>Department of Statistical Science, University College London, United Kingdom  
11 (Gower Street, London, WC1E 6BT)

12 <sup>3</sup>Asian School of the Environment, Nanyang Technological University  
13 (N2-01C-39, 50 Nanyang Avenue, Singapore 639798)

14 <sup>4</sup>Department of Architecture and Building Science, School of Engineering, Tohoku University  
15 (6-6-11-1 Aramaki-aza Aoba, Aoba-ku, Sendai 980-8579, Japan)

16 <sup>5</sup>Department of Civil and Environmental Engineering, Faculty of Engineering, Mahidol University  
17 (25/25 Puttamonthon, Nakorn Pathom, 73170, Thailand)

18 <sup>6</sup>Department of Sustainable Development Technology, Faculty of Science and Technology, Thammasat  
19 University  
20 (99 Moo 18, Phaholyothin Road, Tambon Klong Nung, Amphoe Klong Luang, Pathum Thani 12120,  
21 Thailand)

22 <sup>7</sup>Disaster and Risk Management Information Systems Research Group, Department of Industrial  
23 Engineering, Faculty of Engineering, Chulalongkorn University  
24 (Phayathai Road, Pathumwan, Bangkok 10330 Thailand)

25  
26 **Abstract**

27 Tsunami fragility functions describe the probability of structural damage to tsunami flow characteristics.  
28 Fragility functions developed from past tsunami events (e.g. 2004 Indian Ocean tsunami) are often  
29 applied directly, without modifications, to other areas at risk of tsunami for the purpose of damage and  
30 loss estimations. Consequentially, estimates carry uncertainty due to disparities in construction  
31 standards and coastal morphology between the specific region for which the fragility functions were  
32 originally derived and the region where they were being used. The main objective of this study is to  
33 provide an alternative approach to assessing tsunami damage, especially for buildings in regions where  
34 previously developed fragility functions do not exist. A damage assessment model is proposed in this  
35 study, where load-resistance analysis is performed for each building by evaluating hydrodynamic forces,  
36 buoyancies and debris impacts and comparing them to the resistance forces of each building. Numerical  
37 simulation was performed in this study to reproduce the 2011 Great East Japan tsunami in Ishinomaki  
38 city, which is chosen as a study site. Flow depths and velocities were calculated for approximately 20,  
39 000 wooden buildings in Ishinomaki city. Similarly, resistance forces (lateral and vertical) are estimated  
40 for each of these buildings. The buildings are then evaluated for its potential to collapse. Results from  
41 this study reflect a higher accuracy in predicting building collapse when using the proposed load-  
42 resistance analysis as compared to previously developed fragility functions in the same study area.  
43 Damage is also observed to have likely occurred before flow depth and velocity reach maximum values.  
44 With the above considerations, the proposed damage model might well be an alternative for building  
45 damage assessments in areas which have yet to be affected by modern tsunami events.

46  
47 **Higher resolution figures are attached in the supplementary file.**  
48  
49

50 **1. Introduction**

51 The 2011 Great East Japan earthquake generated a large tsunami which damaged and destroyed more  
52 than 250, 000 buildings (MLIT, 2012). Building damage characteristics from the 2011 event have since  
53 been well-studied and in most cases, used to develop tsunami damage fragility functions (Suppasri et  
54 al., 2015). Tsunami damage fragility functions describe the probability of structural damage to tsunami  
55 flow characteristics, i.e. flow depth, flow velocity and hydrodynamic force. Fragility functions have  
56 been developed from past events (e.g. 2004 Indian Ocean, 2010 Chile and 2011 Great East Japan  
57 tsunamis) and are often applied directly, without modifications, to other areas facing tsunami risk for  
58 damage and loss assessments (Suppasri et al., 2016). The resulting damage estimates carry uncertainty  
59 related to differences in construction standards and coastal morphology between the specific region for  
60 which the fragility functions were originally derived and the region where they are being used.

61 Tsunami fragility functions are modelled using tsunami flow characteristics and building damage  
62 information. [In general, the methods for deriving tsunami fragility functions can be classified into four](#)  
63 [categories.](#)

64 (1) [Empirical methods based on statistical analysis of observed post tsunami damage data \(e.g.,](#)  
65 [Peiris, 2006, Reese et al., 2007, Dias et al. 2009, Valencia et al., 2011, Suppasri et al. 2015 and](#)  
66 [Triantafyllou et al., 2018\).](#) In a field survey, maximum flow depth measured from tsunami water  
67 traces are typically used as explanatory variables of damage. Building damage data is obtained  
68 from on-site observations.

69 (2) [Hybrid techniques that combine tsunami hazard mapping \(numerical simulation of tsunami](#)  
70 [inundation such as maximum flow depth, maximum flow velocity and maximum hydrodynamic](#)  
71 [force\) with interpreted building damage data from remote sensing and \(e.g., Koshimura et al. 2009,](#)  
72 [Omira et al., 2010 and Suppasri et al. 2011\) or other damage data set such as damaged marine](#)  
73 [vessels \(Suppasri et al., 2014\), damaged bridges \(Shoji and Nakamura, 2017\) as well as aquaculture](#)  
74 [rafts and eelgrass \(Suppasri et al., 2018\).](#)

75 (3) [Heuristic fragility functions based on expert opinion such as HAZUS \(FEMA 2013\) and](#)  
76 [Papathoma Tsunami Vulnerability Assessment \(PTVA\) \(Dall’Osso et al., 2016\).](#)

77 (4) [Analytical fragility functions based on structural modelling and response simulations \(e.g.](#)  
78 [Macabuag et al. 2014, Nanayakkara and Dias 2016 and Attary et al. 2017\).](#)

79

80 Recent studies have shown tsunami hydrodynamic force to be an important explanatory parameter  
81 (Macabuag et al., 2016), flow velocity at time of occurrence (Song et al., 2018) and floating debris  
82 (Macabuag et al., 2018) are all factors when assessing building damage. In order to obtain fragility  
83 functions for areas where tsunami data is not yet available, it is necessary to model the deterministic  
84 processes relating tsunami characteristics to the capacity of the structure to resist resulting loads. This  
85 allows for the structural characteristics information specific to the buildings of a region to be taken into  
86 account, as well as bypassing the use of potentially biased observed values for the explanatory variables.  
87 This study investigates interactions between tsunami loading and the resistance of a system (in this case  
88 the resistance of a building) through an analytical model to infer tsunami damage. The objective is to  
89 provide an alternative approach to assessing tsunami damage especially for buildings in areas where  
90 previously developed fragility functions do not exist. As part of this study, tsunami characteristics at  
91 the time of damage occurrence will be investigated and used in the proposed model to provide a  
92 complementary insight into the relationship between structural damage and tsunami flow characteristics.

93 The analytical model is defined following an overview of tsunami flow characteristics and their effects  
94 on buildings. Next, the study site and building damage data set used to demonstrate the application of

95 the model are presented. Two major components of the model are then discussed: tsunami numerical  
96 simulation and the estimation of resisting forces. Model results are compared to other building damage  
97 assessment estimates and observations in order to examine their applicability in building damage  
98 estimation. In addition, because structural damage is usually presented in a qualitative manner, most  
99 tsunami damage assessments may not be readily usable by private or governmental organisations.  
100 Therefore, a financial metric converting existing structural damage levels into financial cost ratios is  
101 proposed.

102

## 103 2. Alternative approach to tsunami damage assessment

104 Damage by tsunamis to infrastructure are caused by many factors such as tsunami forces, impact of  
105 waterborne debris, building characteristics and scouring of foundations (Kelman and Spence, 2004).  
106 Forces generated by a tsunami can be estimated by classifying them according to their flow conditions  
107 and characteristics. Hydrodynamic force is generated by the pressure from flowing waters around the  
108 structure, and is influenced by flow velocity, depth and density of the water as well as the geometry and  
109 angle at which the tsunami hits the structure (Nadal et al., 2010). When hydrodynamic force is used in  
110 tsunami science, it usually refers to the drag force which is directly proportional to the square of flow  
111 velocity. Debris impact force is driven by tsunami flow. Tsunami-borne debris, while not a direct action  
112 of tsunami flow, can cause substantial damage to buildings. It can result in the reduction of load-bearing  
113 capacity in a building, and therefore the reduction in structural resistance to lateral loads and buoyancy  
114 forces (Nadal et al., 2010).

115 The approach taken in this study is an adaptation from Latcherote et al (2017) where they analysed and  
116 compared the overturning mechanism with resisting moment for six overturned reinforced concrete  
117 buildings in Onagawa town. Similarly, the proposed damage model performs load-resistance analysis  
118 for each building by evaluating hydrodynamic forces, buoyancy forces and debris impacts and  
119 comparing them to the resistance of each building. There are two general types of resistance that a  
120 building provides. First, it provides lateral resistance which is designed to counter loads that are  
121 perpendicular to and imposed on walls. Second, the weight of the buildings acts as downward-acting  
122 (vertical) resistance against buoyancy forces or upward-acting loads from wind and seismic activities.  
123 The resistance force from pile foundation was also one of the components examined in Latcharote et al.  
124 (2016). However, because wooden buildings were used for this study, the resistance force from pile  
125 foundation was not considered.

126 Global stability failure in a building can be a result of either sliding or overturning as a solitary body,  
127 often with minimal damage to structural/non-structural components (Yeh et al, 2014). Overturning  
128 refers to the rotation of a building around its foundation where it has failed. Sliding, on the other hand,  
129 is the horizontal translation of a building from its original position (Yeh et al, 2014). The two  
130 mechanisms are modelled separately in this study to determine the predominant mechanism for building  
131 collapse. Differences in the forces and resistance involved in these mechanisms were considered when  
132 performing load-resistance analysis:

- 133 (1) Sliding/Non-submerged at the point of impact (**Fig. 1 (a)**): Only horizontal hydrodynamic force,  
134 debris impact and lateral resistance of the building were considered in this case. A building  
135 collapses if the compounded hydrodynamic and debris impact forces are greater than the lateral  
136 resistance of the building.
- 137 (2) Overturning/Submerged (**Fig. 1 – (b)**): A building collapses when the overturning moment  
138 from hydrodynamic and buoyancy forces is greater than the resisting moment from the building  
139 weight. Under such circumstances, the building can either be fully submerged as illustrated in  
140 **Fig. 1 (b)** or surrounded by water with no water inside. In the former case, when the building  
141 is completely inundated, forces from the exterior of the building are cancelled out. The latter is

142 the worst-case scenario and is assumed for subsequent analyses of overturning mechanisms in  
143 this study.

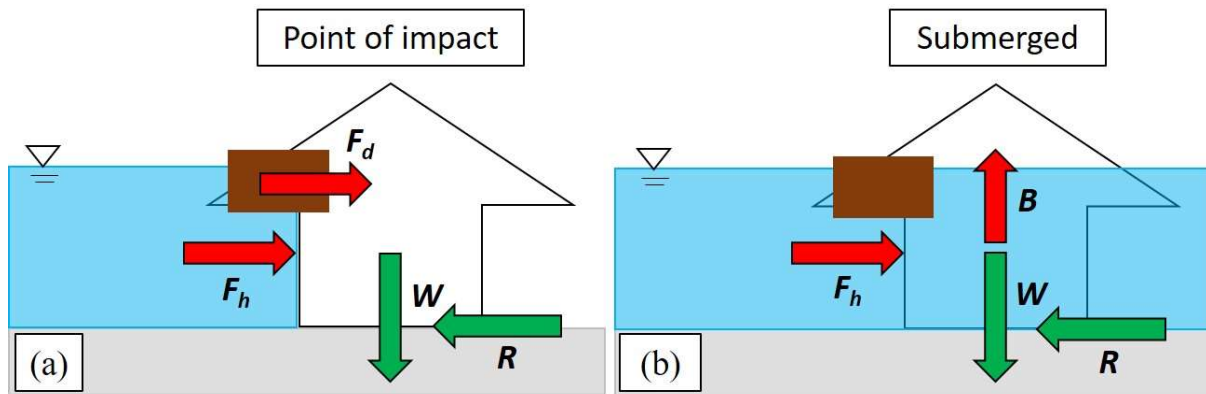

144 **Fig.1** Two failure mechanisms are considered in this study: (a) Sliding and (b) overturning. The forces  
145 denoted are as follows,  $F_h$  = hydrodynamic force,  $F_d$  = debris impact force,  $R$  = lateral resistance,  $W$  =  
146 building weight and  $B$  = buoyancy force.  
147  
148

## 149 2.1 Selection of study site

150 There were many possible areas for studying building damage from the 2011 Great East Japan tsunami  
151 event. A suitable study site needs to be highly representative of the processes being modelled, without  
152 excessive contributions of un-modelled effects. In addition, a previously investigated area would allow  
153 for a fair assessment of the analytical model's results. Ishinomaki City, Miyagi Prefecture was therefore  
154 selected as the area displayed the following characteristics:

- 155 1. Less impact from wave amplification: Ishinomaki City is located on a plain coast which reduces  
156 the effects of wave amplification unlike coastal towns located along the Sanriku Ria Coast
- 157 2. Less impact from floating debris: The populated areas of Ishinomaki are far from fishing ports and  
158 storage facilities, many of which were damaged by the tsunami and generated floating debris, which  
159 can magnify building damage. Floating debris from broken pine trees can also be excluded from  
160 consideration as the coastal pine forest along the city survived.
- 161 3. Less impact from wave directions: The effects from varying wave directions are minor as most of  
162 the buildings were lined facing the shoreline and the direction of wave attack was perpendicular to  
163 the front of the buildings.
- 164 4. Largest sample size: The number of buildings affected by the 2011 event was largest in  
165 Ishinomaki City amongst cities along the plain coast.
- 166 5. Previously developed fragility functions: Fragility functions have been previously developed for  
167 the populated areas of Ishinomaki City (Charvet et al., 2014). A new study from Hasegawa et al.,  
168 (2018) provides an excellent opportunity to compare the proposed method in this study with the  
169 established model.

## 170 2.2 Building damage data

171 Detailed building damage data from field observations was obtained from the Ministry of Land,  
172 Infrastructure and Transportation and Tourism (MLIT) (MLIT, 2012) (**Fig. 2**) to test the applicability  
173 of the proposed building damage model. The data consists of building size (length and width), number  
174 of stories, construction material and interpolated measured maximum flow depth of each building. Each  
175 building was also classified according to their observed damage. There are a total of six damage levels  
176 in the classification scheme by MLIT. Low damage levels (i.e. levels 1 – 4) are easily misclassified in  
177 damage assessments due to overlapping descriptions in the classification scheme (Leelawat et al., 2014),  
178 whereas damage levels 5 and 6 are straightforward in their definitions (**Fig. 3**). “Washed away” and  
179 “destroyed” (levels 5 and 6) refer to structures which are irreparable. In this study, the two levels

180 “washed away” and “destroyed” are considered since sliding and overturning mechanisms fall into the  
 181 aforementioned categories. As opposed to lower damage levels, these damage modes are driven by the  
 182 structural properties of these buildings, thus only buildings damaged at these levels were used for this  
 183 study. The building type considered in this pioneer study is only wooden residential houses due to their  
 184 large sample size in this area.

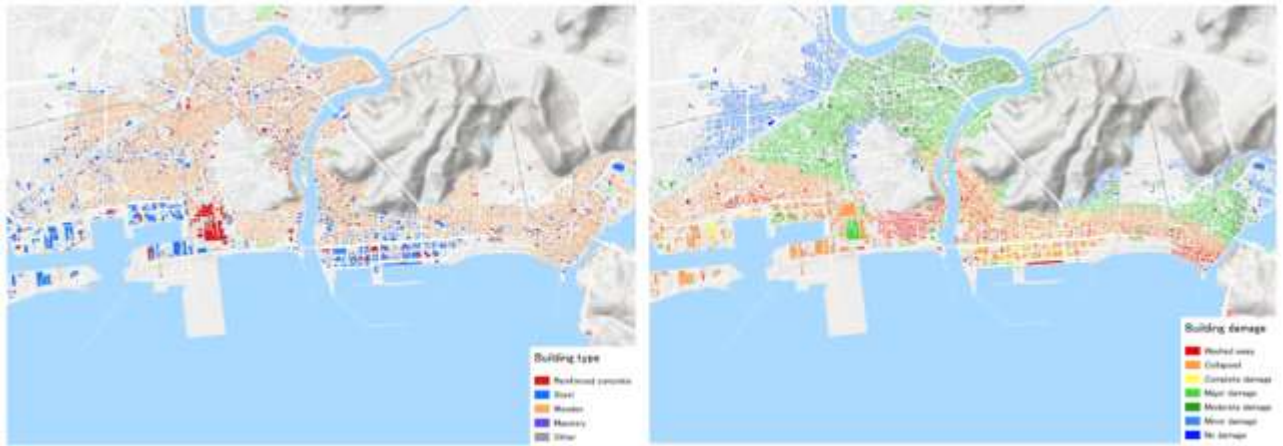

185  
 186 **Fig.2** (Left) Distributions of building types and (Right) building damage levels.

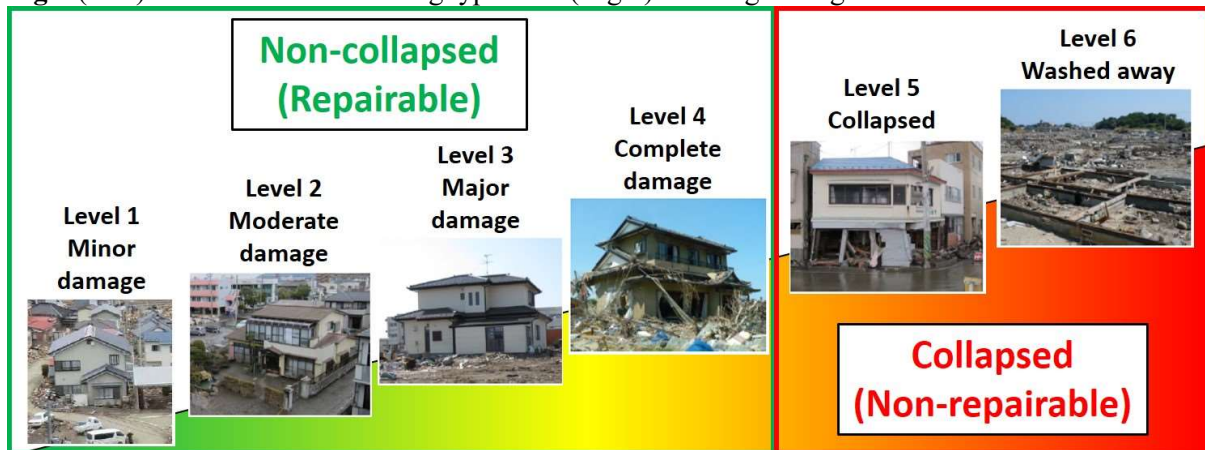

187  
 188 **Fig. 3** Building damage levels and collapsed condition considered in this study (courtesy of MLIT,  
 189 2012).

### 190 2.3 Numerical simulation of the 2011 tsunami and damage inducing forces

191 Tsunami flow characteristics (flow depth, velocity and hydrodynamic force) at the point of damage  
 192 occurrence were estimated in a time series analysis of the 2011 Great East Japan tsunami, which was  
 193 reproduced by numerical simulation. The numerical model computed tsunami propagation and run-up  
 194 by using a set of nonlinear shallow water equations which were solved by staggered leap-frog finite  
 195 difference scheme, and bottom frictional values were written using Manning’s formula (Suppasri et al.,  
 196 2011, Charvet et al., 2015 and Macabaug et al., 2016). The model set-up includes the preparation of  
 197 bathymetry and topography data – a nested grid system consisting of six computational domains – 1215  
 198 m (Region 1), 405 m (Region 2), 135 m (Region3), 45 m (Region 4), 15 m (Region 5) and 5 m (Region  
 199 6) was used for the study area (Fig. 4). A constant value of Manning coefficient was applied to all  
 200 computational grids except at the finest resolution (Region 6) where different Manning’s roughness  
 201 coefficients specified according to land use types and building density, as the effect of bottom friction  
 202 on tsunami propagation in deep waters negligible. Tidal level was set to tide conditions at the time of  
 203 tsunami occurrence in 2011 and simulation time was set to three hours. Initial water surface elevation  
 204 was assumed to follow sea floor deformation and the fault parameters proposed by Tohoku University  
 205 model (Imamura et al, 2016) were selected to reproduce the 2011 Great east Japan tsunami. Results of  
 206 numerical simulation are shown in Fig. 5.

207 The accuracy of model is validated by comparing measured tsunami trace heights and modelled results  
 208 (Fig. 6) using Aida's  $K$  and  $\kappa$  (Aida, 1978) as defined in equations (1) - (3) below.

209 
$$\log K = \frac{1}{n} \sum_{i=1}^n \log K_i \quad (1)$$

210 
$$\log \kappa = \sqrt{\frac{1}{n} \sum_{i=1}^n (\log K_i)^2 - (\log K)^2} \quad (2)$$

211 
$$K_i = \frac{x_i}{y_i} \quad (3)$$

212 Where,  $x_i$  and  $y_i$  are the measured and simulated tsunami trace heights (Mori et al., 2012) at point  $i$ .  
 213 Consequently,  $K$  is regarded as a correction factor to adjust the modeled values to fit the actual tsunami  
 214 averaged over several locations;  $\kappa$  is defined as a measure of the fluctuation or deviation in  $K_i$ . Values  
 215 of Aida's  $K$  and  $\kappa$  are 1.04 and 1.32 respectively. The corrected tsunami simulation produced tsunami  
 216 flow depths which are a close match to the measured tsunami trace heights and satisfy the guideline of  
 217 the Japan Society of Civil Engineers (JSCE) ( $0.95 < K < 1.05$  and  $\kappa < 1.45$ ) (JSCE, 2016). Hence,  
 218 tsunami flow depths and velocities in Ishinomaki City of higher accuracy were reproduced.

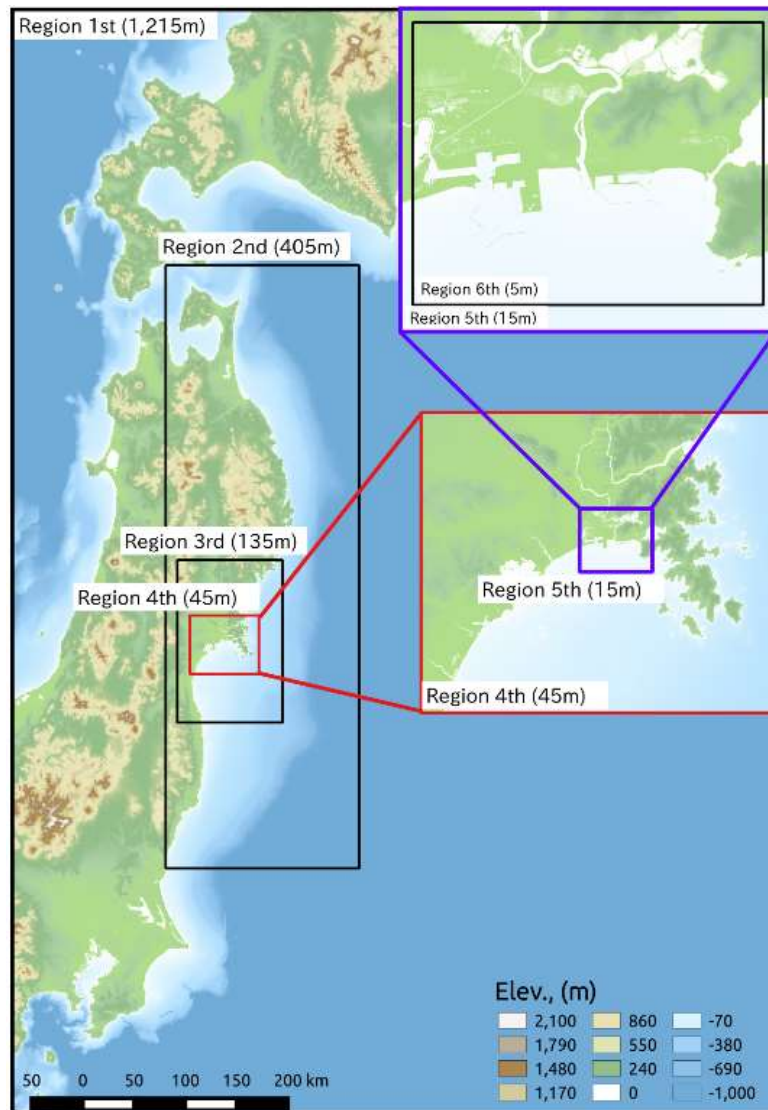

219

220 **Fig.4** Computational regions in this study. Projection of bathymetry and topography data is the Japanese  
 221 Geodetic Datum 2000 and the Tokyo Peil (T.P.) datum.  
 222

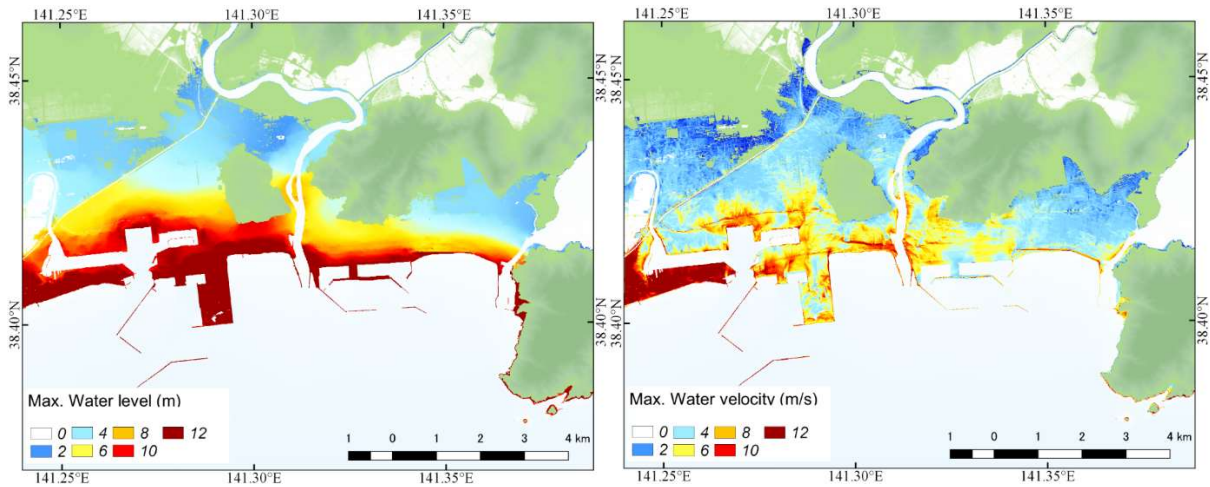

223 **Fig. 5** Results of tsunami numerical simulation: (Left) Maximum flow depth and (Right) Maximum  
 224 flow velocity.  
 225  
 226

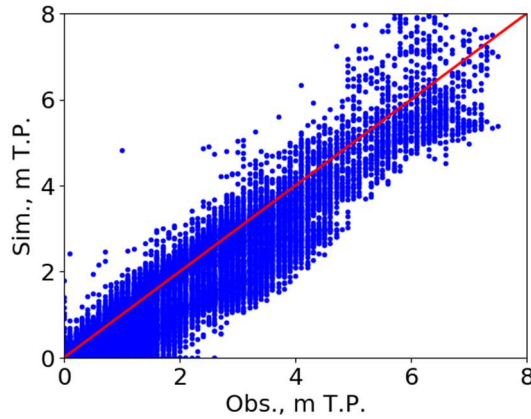

227 **Fig. 6** Validation of the simulated tsunami inundation heights using the observed tsunami trace  
 228 heights (Mori et al., 2012).  
 229  
 230

231 Results from the tsunami simulation were used to estimate tsunami-induced forces. Flow depth and  
 232 velocity values were captured at each time step of the simulation and at each building location for more  
 233 than 20,000 wooden buildings in Ishinomaki city. These values were then used to calculate  
 234 hydrodynamic force ( $F_h$ ) through drag formula (equation (4)), debris impact force ( $F_d$ ) through impulse-  
 235 momentum approach (equation (5)) as well as buoyancy force ( $B$ ) (equation (6)) at each time step for  
 236 each building (**Fig. 1**).

237 
$$F_h = \frac{1}{2} C_D \rho u^2 D \quad (4)$$

238  
 239 
$$F_d = m \frac{u}{\Delta t} \quad (5)$$

240  
 241 
$$B = \rho g V \quad (6)$$

242

243 Where  $C_D$  denotes the drag coefficient ( $C_D = 1.5$  as an average value from 1.25 to 2.00 depending on  
244 the width to depth ratio, FEMA, 2003),  $\rho$  the density of water ( $= 1,000 \text{ kg/m}^3$ ),  $u$  the current velocity  
245 (m/s),  $D$  inundation depth (m),  $m$  (kg) the weight of debris,  $\Delta t$  the duration of impact ( $= 0.7$  sec for  
246 wooden wall, FEMA, 2003),  $g$  the gravitational acceleration and  $V$  the submerged volume. This study  
247 follows the recommended weights of floating debris by the American's Federal Emergency  
248 Management Agency (FEMA, 2003) and Japan Society of Material Cycles and Waste Management  
249 (JSCWM, 2011), where the estimates were approximately 500 kg for a pine tree, 3,000 kg for a vehicle,  
250 and buildings - 15,000 kg, 30,000 kg and 60,000 kg for moderately damaged, majorly damaged and  
251 collapsed buildings respectively.

252

## 253 2.4 Resistant forces

254 In this study, the designed resistance of each building to withstand loads imposed on them is considered  
255 as its damage threshold. One aim is to determine if the modelled tsunami induced forces (i.e.  
256 hydrodynamic force, buoyancy force and debris impact force) for each building would exceed its  
257 damage threshold and therefore, result in damage to the building. As mentioned earlier, differences in  
258 the types of loads imposed and types of building resistance forces involved were considered when  
259 modelling sliding and overturning mechanism of a building. Both mechanisms were modelled  
260 separately. There are two types of resistant forces in a building i.e. vertical and lateral resistance. The  
261 vertical resistance of a building is its weight, and in this study, it was assumed to be  $3,000 \text{ kN/m}^2$  for  
262 each building (Yokohama City, 2018). Vertical load-resistance analysis was used to determine  
263 overturning mechanisms.

264 For the first time, lateral resistance ( $R$ ) from the bearing wall of a building will be considered when  
265 estimating building damage from tsunamis. The failure of lateral resistance of a building can imply that  
266 sliding mechanisms are involved in its collapse. The bearing wall of a building must be able to resist  
267 lateral loads imposed on them such as wind or seismic activity. The lateral resistance of each building  
268 to earthquake and wind forces was calculated in accordance with Article 46 Enforcement Ordinance of  
269 Building Standard Law (MLIT, 2018), and in which case, lateral resistance is the product of the lateral  
270 strength of the bearing wall and the required wall length of each building. The lateral strength of the  
271 bearing wall by Japanese housing design standard is  $1.96 \text{ kN/m}$  (MLIT, 2018).

272 Calculations for the required wall length would differ for both seismic and wind loads. Required wall  
273 length for seismic loads can be derived by taking the building's floor area and multiplying it by its  
274 design coefficient for seismic load (Fig. 7) (MLIT, 2018) as illustrated in Example 1. On the other hand,  
275 for wind loads, the required wall length can be calculated by multiplying the design coefficients with  
276 the vertical projection area (both the front and side of the building) (MLIT, 2018) as illustrated in  
277 Example 2. The vertical projection area is the area defined by the building width or length multiplied  
278 by the floor height above 1.35 m (Fig. 8). As information on building heights in Ishinomaki city was  
279 not available at the point of this study, an anonymous interview was conducted with a local housing  
280 construction company. The estimates provided for the heights of the first, second and third floors of an  
281 average wooden housing were 3.5 m, 2.7 m and 2.1 m respectively, which were then used as the average  
282 values for the purpose of this study. Wooden buildings in Ishinomaki city did not exceed three stories.

283 In this study, the lateral resistance of a building against tsunami impacts is considered as the sum of  
284 lateral resistance for floors below the modelled maximum flow depth. Estimation of lateral resistance  
285 for buildings should be taken with care as it was calculated for each floor. The total lateral resistance of  
286 a building against seismic or wind loads would be the sum of lateral resistance for every floor where  
287 maximum tsunami flow depth has reached. The highest estimated lateral resistance between seismic  
288 and wind loads was then chosen as the maximum effective resistance, hence the assumed lateral  
289 resistance design for each building. It should also be noted that the design lateral resistance may



290 decrease due to age and ground shaking from previous earthquakes. A previous study done by the Japan  
 291 Building Disaster Prevention Association (2012) reported 0.7 as the minimum reduction coefficient to  
 292 account for these effects. Therefore, a range of bearing wall resistance reduction coefficients (0.7, 0.8,  
 293 0.9 and 1.0) was introduced when calculating the lateral resistance of the building.

294

295 **Example 1**

296 Calculation example of required wall length for seismic load

297 One story with 60 m<sup>2</sup> of floor area, the required wall length = 60 m<sup>2</sup> × 15 cm/m<sup>2</sup> = 900 cm = 9 m

298

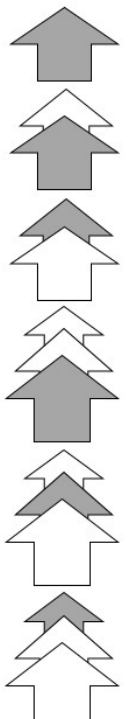

|                      |                                            |
|----------------------|--------------------------------------------|
| 15 cm/m <sup>2</sup> | One story building                         |
| 33 cm/m <sup>2</sup> | The first floor of two stories building    |
| 21 cm/m <sup>2</sup> | The second floor of two stories            |
| 50 cm/m <sup>2</sup> | The first floor of three stories building  |
| 39 cm/m <sup>2</sup> | The second floor of three stories building |
| 24cm/m <sup>2</sup>  | The third floor of three stories building  |

299

300

301 **Fig. 7** Design coefficients for calculating corresponding necessary wall length against seismic load for  
 302 1-3 stories wooden houses (MLIT, 2018).

303

304 **Example 2**

305 Calculation example of required wall length for wind load

306 The first floor of two stories building,

307 Front: Required wall length = ①A (m<sup>2</sup>) × 50 cm/m<sup>2</sup>

308 Side: Required wall length = ②B (m<sup>2</sup>) × 50 cm/ m<sup>2</sup>

309

310 The second floor of two stories building

311 Front: Required wall length = ②A (m<sup>2</sup>) × 50 cm/m<sup>2</sup>

312 Side: Required wall length = ②B (m<sup>2</sup>) × 50 cm/ m<sup>2</sup>

313 The design wall length for wind load will be the summation of the maximum value at each floor.

314

315

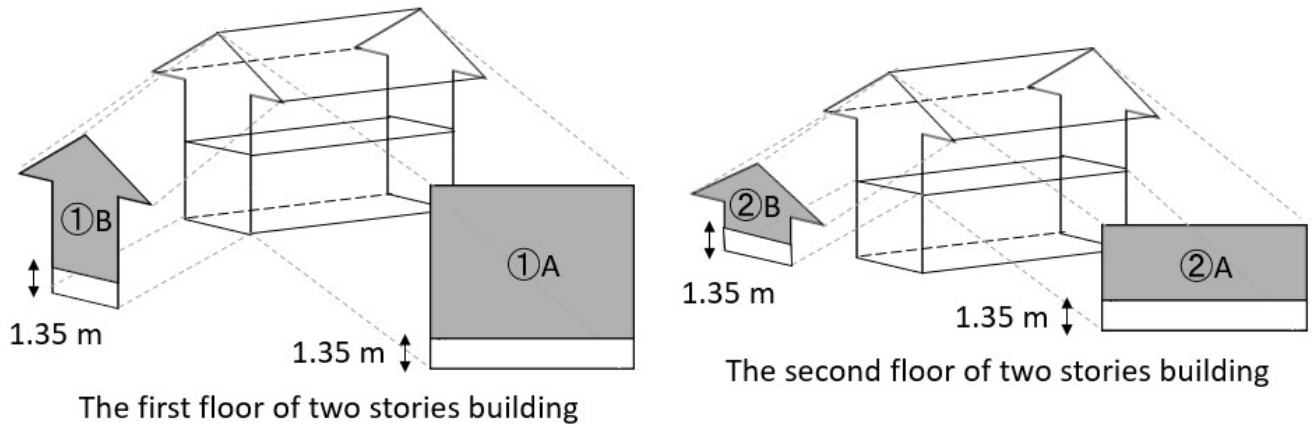

316

317

318

319 **2.5 Building damage replacement cost ratio**

320 Although financial loss is not the central focus of this paper, it is a good opportunity to present a  
 321 potential building damage replacement cost index for wooden buildings for future loss estimates. At  
 322 present, tsunami building damage costs are based on data obtained from insurance claims after tsunami  
 323 events. Loss estimates are, for the most part, based on analyses which are separate from the damage  
 324 assessments and they do not account for building conditions and tsunami hydrodynamics.

325 The building damage levels proposed by MLIT (**Fig. 3**) formed the basis of developing the replacement  
 326 cost index. Throughout this study, the focus has been on collapsed buildings (levels 5 and 6). This index  
 327 however will be representative of both collapsed and non-collapsed buildings. Collapsed buildings can  
 328 automatically be assigned as 100% loss as they are assumed to be irreparable. In general, construction  
 329 costs of two-storey wooden houses in Japan comprise two components – architectural works which  
 330 forms 70% of total costs and structural works which forms 30%. Costs of structural works can be further  
 331 broken down into non-structural components (roofs (20%) and walls (10%)) and structural components  
 332 (beams (20%), columns (15%) and footings (45%)) of the building. The averaged numbers of each  
 333 component were calculated based on actual data of several houses (MN Housing and Building  
 334 Laboratory, 2015, Cabinet Office of Japan, 2017, and Japan Wood-Products Information and Research  
 335 Center, 2019,).

336

337 **3. Results and discussion**

338 **3.1 Accuracy of the proposed building damage assessment method**

339 The results of the proposed building damage assessment model were compared to field observations to  
 340 assess its performance (**Fig. 9**). Field observations are presented in the MLIT database and only  
 341 buildings with damage levels 5 and 6 (collapse conditions) were used for comparison. **Table 1** shows  
 342 an accuracy of modelled collapsed buildings and actual collapsed buildings from field observations  
 343 when only sliding mechanism was considered, and **Table 2** when both sliding and overturning  
 344 mechanisms were considered. Both tables have clearly illustrated that debris impact forces and  
 345 resistance reduction coefficients do not seem to have significantly influenced the collapse of buildings  
 346 in Ishinomaki. Damage analysis without debris weight input and building resistance reduction  
 347 coefficient showed a better match. This can be attributed to the fact that Ishinomaki city was not heavily  
 348 affected by floating debris for the reasons stated in **section 3.1**.

349

350 **Tables 1 and 2** highlight sliding mechanism alone is a poor explanation of collapse. In other words,  
 351 overturning is an important mechanism when analyzing building collapse. When using the proposed

352 method, the modelled results show a near 100% accuracy, as shown in **Table 2** and illustrated in **Fig.**  
 353 **9**.

354 **Table 1** Damage assessment accuracy (%): Washed away and destroyed buildings (damage levels 5  
 355 and 6) by considering only sliding as damage mechanism.

| Debris weight | Resistance reduction coefficient |       |       |       |
|---------------|----------------------------------|-------|-------|-------|
|               | 1                                | 0.9   | 0.8   | 0.7   |
| 0 ton         | 65.24                            | 66.54 | 68.02 | 69.84 |
| 0.5 tons      | 59.27                            | 60.44 | 61.86 | 63.61 |
| 3 tons        | 61.43                            | 62.92 | 64.55 | 66.39 |
| 15 tons       | 67.45                            | 68.88 | 70.56 | 72.26 |
| 30 tons       | 72.44                            | 72.21 | 71.13 | 69.43 |
| 60 tons       | 89.32                            | 89.40 | 89.49 | 59.48 |

356

357 **Table 2** Damage assessment accuracy (%): Washed away and destroyed buildings (damage levels 5  
 358 and 6) by considering both damage mechanisms.

| Debris weight | Resistance reduction coefficient |       |       |       |
|---------------|----------------------------------|-------|-------|-------|
|               | 1                                | 0.9   | 0.8   | 0.7   |
| 0 ton         | 99.79                            | 99.77 | 99.73 | 99.69 |
| 0.5 tons      | 96.46                            | 96.44 | 96.40 | 96.35 |
| 3 tons        | 96.29                            | 96.19 | 96.03 | 95.81 |
| 15 tons       | 91.97                            | 91.25 | 90.17 | 88.96 |
| 30 tons       | 85.37                            | 83.71 | 81.67 | 79.49 |
| 60 tons       | 93.73                            | 93.77 | 93.83 | 72.26 |

359

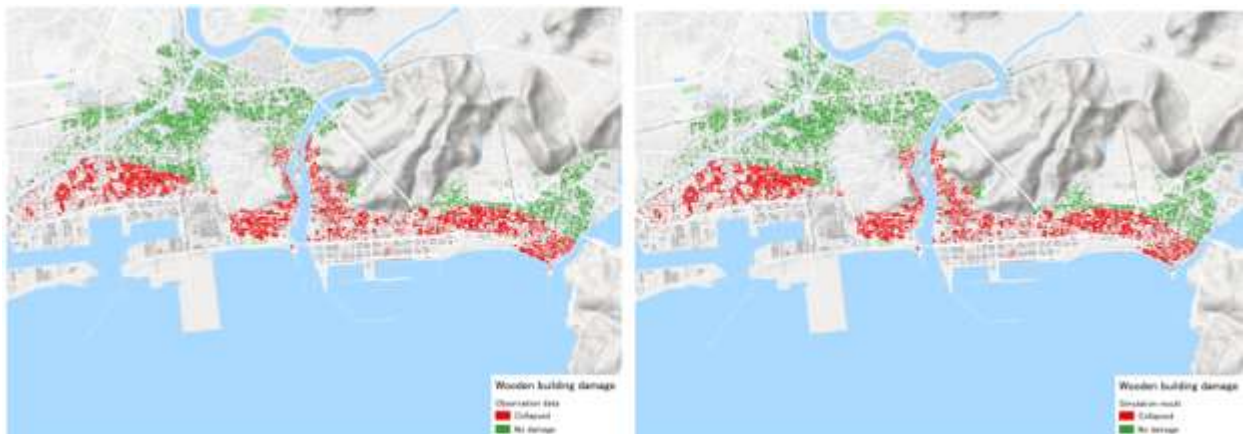

360

361 **Fig. 9** Distributions of collapsed and non-collapsed buildings from field observation (left) and the  
 362 proposed method (right)

363 **3.2 Comparison of minimum load values for the collapse of wooden buildings against field**  
 364 **observations and hydraulic experiments**

365 The average lateral resistance of a building in Ishinomaki, derived from 19, 000 wooden houses in this  
 366 study, is estimated to be about 42 kN, and the average hydrodynamic force is about 10 kN. These  
 367 findings are evaluated and compared to other findings in tsunami literature to understand the dominant  
 368 mechanism of building collapse. In a hydraulic experiment by Arikawa (2009), the flexural capacity of  
 369 a wooden wall was tested. A wooden wall (2.5 m high and 2.7 wide) supported by a steel frame was  
 370 placed in a water flume in a full-scale experiment. The wooden wall was found to be destroyed at a

371 tsunami flow depth of 2.5 m. The flexural capacity of the wooden wall was  $10 \text{ kN/m}^2$ , which is  
372 equivalent to 67.5 kN. Matsutomi and Harada (2010) measured tsunami flow depth at the front and back  
373 of buildings during their field survey. Based on the survey and estimated Froude number, they found  
374 that for wooden houses, the necessary lateral force required to cause moderate damage is 5.4 – 9.9 kN/m  
375 and for major damage is 9.7 – 17.6 kN/m. Therefore, the minimal lateral load required for wooden  
376 houses to be washed away is approximately 9.7 – 17.6 kN/m or 88 -176 kN, assuming that the width of  
377 the house is 5 – 10 m. This information further supports the consideration of overturning as a critical  
378 explanation for collapse mechanism.

379

### 380 **3.3 Tsunami characteristics at the time of collapse and influence of flow characteristics on** 381 **damage**

382 Critical flow depth ( $D_c$ ) and critical flow velocity ( $V_c$ ) values are flow depths and velocities at the time  
383 of building collapse or rather, when buildings were considered collapsed when using the proposed  
384 damage model. In this study, a further assessment was made to derive maximum flow values and  
385 compare them to the critical values modelled for each building. In general, the critical values are lower  
386 than maximum values for both flow depth and velocity (**Figs. 10 & 11**). The maximum flow depth ( $D_m$ )  
387 is about four times higher than the critical flow depth and maximum flow velocity ( $V_m$ ) is about two  
388 times higher than the critical flow velocity (**Table 3**). The implication is straightforward – building  
389 damage would be highly underestimated when using maximum flow characteristics as explanatory  
390 variables. It underscores one of the weaknesses of using traditional tsunami damage assessment  
391 methodologies.

392 It is also observed that flow depth and flow velocity contribute differently to total building damage.  
393 Critical flow depth and velocity for collapsed (damage levels 5 and 6) and non-collapsed buildings are  
394 plotted in **Fig. 12** and it appears that wooden buildings would almost always get washed away when  
395 critical flow velocity exceeds 2 m/s, regardless of the value of critical flow depth. This value may serve  
396 as a simple indicative criterion to assess building damage potential. This criterion when used together  
397 with developed tsunami maps or numerical flow simulation allows for some initial building damage  
398 assessment and quick estimations.

399 The influence of flow depth and flow velocity on building damage may also vary across space. The  
400 relationship between critical and maximum flow depth values are represented as ratios and the  
401 distribution of these ratios are plotted in a map (**Fig. 13 (Left)**). Similarly, the distribution of the ratio  
402 between critical and maximum flow velocities are plotted in a map (**Fig. 13 (Right)**). Flow velocity  
403 appears to be a more significant parameter of damage (as ratios are close to 1.00) in areas nearer to the  
404 shoreline where flow velocity is very high and tsunami induced force is mostly hydrodynamic. On the  
405 other hand, flow depth has a greater influence on damage in areas nearer to the inundation limit where  
406 pressure from the tsunami is mostly hydrostatic.

407

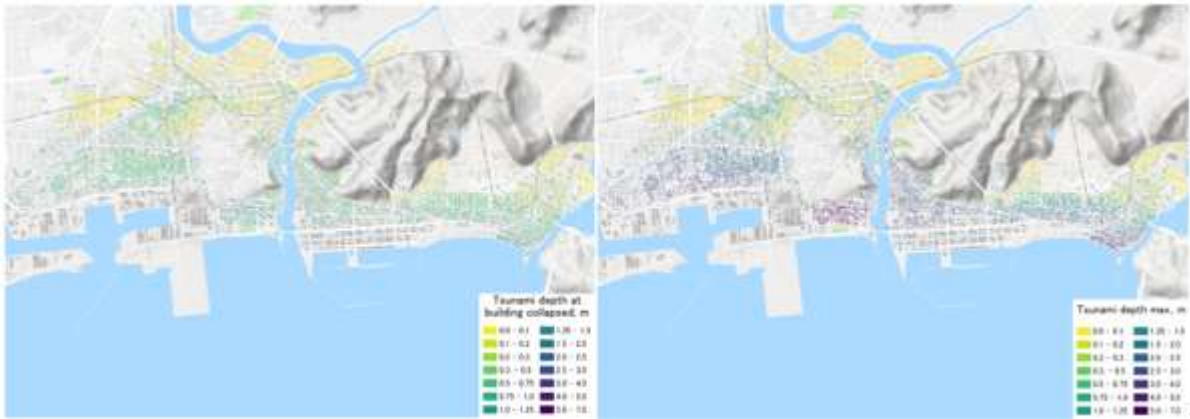

408

409 **Fig. 10** Distribution of the **simulated** critical flow depth (left) and the **simulated** maximum flow depth  
 410 (right)

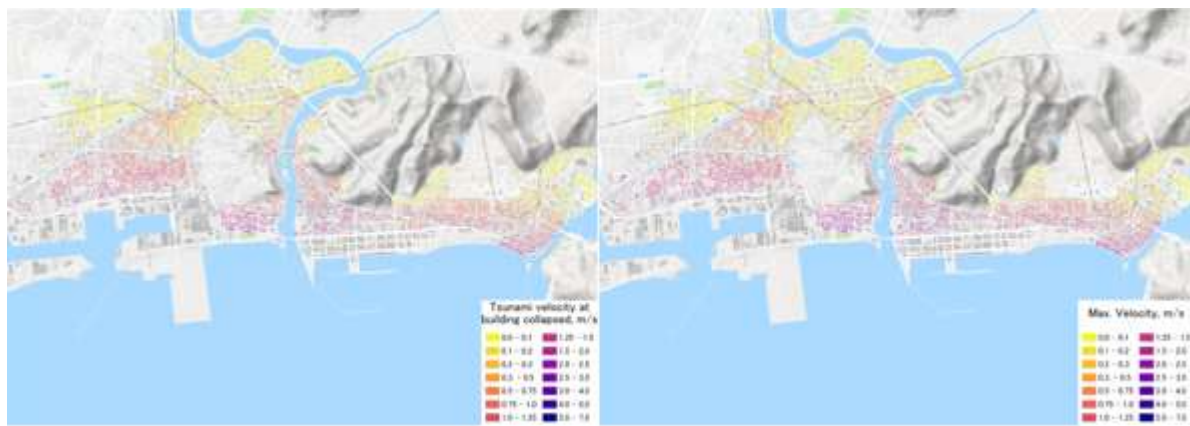

411

412 **Fig. 11** Distribution of the **simulated** critical flow velocity (left) and the **simulated** maximum flow  
 413 velocity (right)

414

415 **Table 3** Flow depth and velocity ratios (washed away and destroyed buildings: damages levels 5 and  
 416 6).

| Damage conditions | $D_m / D_c$ | $V_m / V_c$ |
|-------------------|-------------|-------------|
| Collapsed         | 4.03        | 2.34        |
| Non-collapsed     | 1.56        | 1.16        |

417

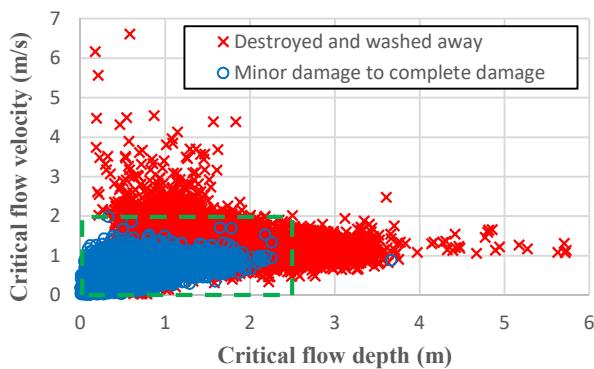

418

419 **Fig.12** Plotting of the critical flow depth and critical flow velocity

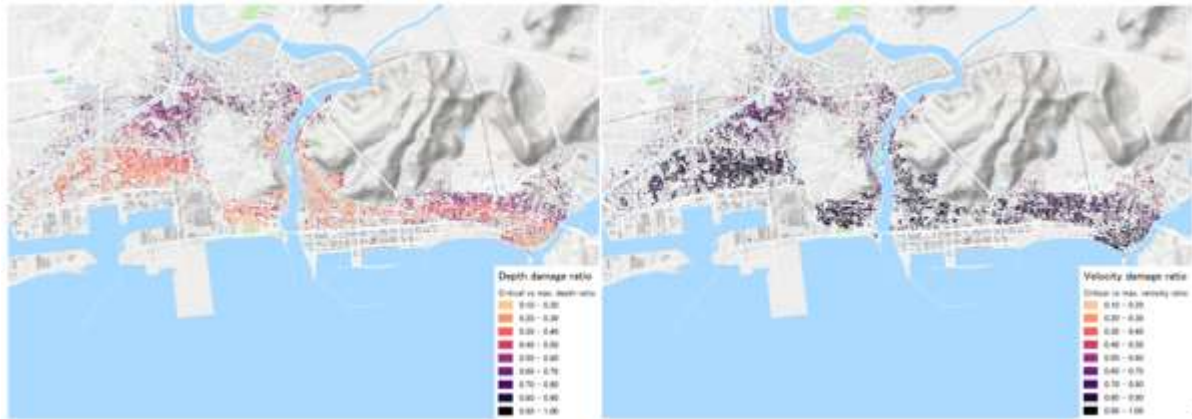

420

421 **Fig. 13** Distributions of ratios between the critical and the maximum values of the simulated flow  
 422 depth (left) and flow velocity (right). Higher ratios are found near inundation limit for the flow depth  
 423 whereas near shoreline for the flow velocity.

424

### 425 3.4 Comparing results from fragility functions

426 Building collapse in Ishinomaki City was recently modelled by Hasegawa et al. (2018), where they  
 427 developed fragility functions using the same building damage dataset (MLIT, 2012) and collapse  
 428 criteria. The fragility functions were developed by applying logistic regression (where damage states  
 429 follow a binomial distribution). The estimated damage probabilities are calculated as per equation (7).  
 430 Values of the maximum likelihood estimations are presented in **Table 4**.

431

$$432 \quad p = \frac{1}{1 + \exp(-a_0 - a_i x_i - \dots)} \quad (7)$$

433

434 Where  $p$  is a probability of collapse,  $a_n$  is a regression constant and  $x_n$  is an explanatory variable. In the  
 435 damage assessment of this study, a building is classified as collapsed when the probability of collapse  
 436 is higher than 50%.

437

438 **Table 4** The maximum likelihood estimates (Hasegawa et al., 2018)

|                    | Estimate | Stand. Error | Z value  | Pr (> z ) | p value |
|--------------------|----------|--------------|----------|-----------|---------|
| Constant term      | -3.9250  | 0.0514       | -76.4360 | < 2e-16   | *       |
| RC building        | -1.7970  | 0.0814       | -22.0870 | < 2e-16   | *       |
| Wooden building    | 1.4120   | 0.0440       | 32.1180  | < 2e-16   | *       |
| Numbers of stories | -0.4242  | 0.0164       | -25.8550 | < 2e-16   | *       |
| Functions          | 0.2272   | 0.0277       | 8.2050   | 2.31E-16  | *       |
| Flow depth         | 1.0530   | 0.0060       | 174.1830 | < 2e-16   | *       |
| Building area      | -0.0003  | 0.0000       | -7.1890  | 6.53E-13  | *       |

439 p value: \* < 0.001

440

441 Results from this study are compared to the fragility functions to determine how well building damage  
 442 can be identified when using either the proposed method or the fragility functions. The building damage  
 443 condition is reproduced using both methods and compared to actual observations as shown in **Fig. 14**.  
 444 The proposed method is able to correctly reproduce collapsed and non-collapsed buildings with 99.79%  
 445 accuracy, while the fragility functions are able to reproduce building damage conditions with 91.06%  
 446 accuracy, as summarized in **Table 5**. It can be observed the model based on fragility functions does not  
 447 perform as well when assessing building damage in the zone separating collapsed and non-collapsed  
 448 buildings.

449 It should be noted that building damage assessment with such accuracy can only be replicated because  
 450 of the strict construction design standards in Japan. How well the proposed method will perform in a  
 451 context outside of Japan will be largely dependent on local practices in the design and construction of  
 452 the buildings, the presence debris material and the age of the building (resistance reduction coefficients).  
 453 Additionally, flow-building interactions which yield lower damage states are not accounted for, so the  
 454 model may not perform as well for flow conditions which are less severe than the 2011 Great East Japan  
 455 tsunami.

456

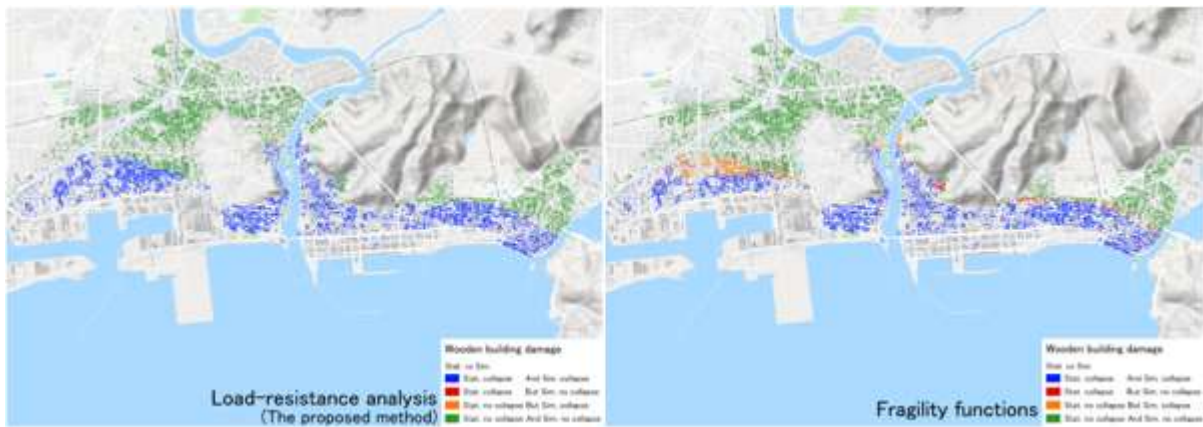

457

458 **Fig. 14** Reproduction of building damage condition (collapse or non-collapse): Comparison between  
 459 the proposed method and field observation (left) and Fragility functions and field observation (right).  
 460 **Blue:** Correct reproduction of collapsed buildings, **Green:** Correct reproduction of non-collapsed  
 461 buildings, **Red:** Failure to reproduce collapsed buildings and **Orange:** Failure to reproduce non-  
 462 collapsed buildings.

463

464

465

466

467

468

469

470

471

472 **Table 5** Building damage assessment accuracy of this proposed method and previously developed  
 473 fragility functions compared to field observations. This table shows numbers of buildings for each  
 474 condition and their accuracy percentages.

475

|                   |               | Analytical method (this study) |                 |
|-------------------|---------------|--------------------------------|-----------------|
|                   |               | Collapsed                      | Non-collapsed   |
| Field observation | Collapsed     | 8,518 (45.22%)                 | 33 (0.18%)      |
|                   | Non-collapsed | 7 (0.04%)                      | 10,277 (54.56%) |

|                   |               | Fragility functions |                |
|-------------------|---------------|---------------------|----------------|
|                   |               | Collapsed           | Non-collapsed  |
| Field observation | Collapsed     | 7,362 (39.09%)      | 1,189 (6.31%)  |
|                   | Non-collapsed | 519 (2.76%)         | 9,765 (51.85%) |

476

477 **3.5 Financial loss metrics**

478 **Damage ratio of each structural and non-structural component at each damage level was interpreted**  
 479 **based on MLIT’s building damage definition (MLIT, 2012).** On account of approximations of the  
 480 construction cost **as presented in section 2.5,** each building damage level defined by structural damage  
 481 condition can be converted into replacement cost ratio as follows (**Table 6** and **Table 7**).

482 **Table 6** MLIT’s damage level classification, description and condition (MLIT, 2012) and **the damage**  
 483 **ratio for structural works and architectural works**

| Damage level | Classification  | Description                                                                               | Condition                                                          | Structural works                               | Architectural works |
|--------------|-----------------|-------------------------------------------------------------------------------------------|--------------------------------------------------------------------|------------------------------------------------|---------------------|
| 1            | Minor damage    | There is no significant structural or non-structural damage, possibly only minor flooding | Possible to be use immediately after minor floor and wall clean up | 0%                                             | 25%                 |
| 2            | Moderate damage | Slight damages to non-structural components                                               | Possible to be use after moderate reparation                       | 10% to roof and wall                           | 50%                 |
| 3            | Major damage    | Heavy damages to some walls but no damages in columns                                     | Possible to be use after major reparation                          | 25% to roof and wall                           | 75%                 |
| 4            | Complete damage | Heavy damages to several walls and some columns                                           | Possible to be use after a complete reparation and retrofitting    | 50% to roof and wall<br>25% to beam and column | 100%                |



|   |                        |                                                                                                      |                                                                                        |                                                |      |
|---|------------------------|------------------------------------------------------------------------------------------------------|----------------------------------------------------------------------------------------|------------------------------------------------|------|
| 5 | Destroyed or collapsed | Destructive damage to walls (more than half of wall density) and several columns (bend or destroyed) | Loss of functionality (system collapse). Non-repairable or great cost for retrofitting | 75% to roof and wall<br>50% to beam and column | 100% |
| 6 | Washed away            | Washed away, only foundation remained, total overturned                                              | Non-repairable, requires total reconstruction                                          | 100% to all components                         | 100% |

484

485 **Table 7** Summary of 1) ratio of the cost of structural works, 2) damage ratio of each structural and non-  
486 structural component at each damage level and 3) replacement cost ratio

| Damage level | Roof | Beam | Column | Wall | Footing | Replacement cost ratio | Final replacement cost ratio |
|--------------|------|------|--------|------|---------|------------------------|------------------------------|
|              | 0.1  | 0.2  | 0.15   | 0.1  | 0.45    |                        |                              |
| 1            | 0    | 0    | 0      | 0    | 0       | 0.18                   | 0.18                         |
| 2            | 0.1  | 0    | 0      | 0.1  | 0       | 0.36                   | 0.36                         |
| 3            | 0.25 | 0    | 0      | 0.25 | 0       | 0.54                   | 0.54                         |
| 4            | 0.5  | 0.25 | 0.25   | 0.5  | 0       | 0.76                   | 0.76                         |
| 5            | 0.75 | 0.5  | 0.5    | 0.75 | 1       | 0.78                   | 1.00                         |
| 6            | 1    | 1    | 1      | 1    | 1       | 1.00                   | 1.00                         |

487

488 Damage level 1: Minor damage (Replacement cost ratio = 18%)

489 Because of its damage description as “no significant structural or non-structural damage, possibly only  
490 minor flooding”. A 25% architectural works is applied as the condition “Possible to be use immediately  
491 after minor floor and wall clean up”.

492 **Replacement cost ratio =  $0.3 \times [(0 \times 0.1) + (0 \times 0.2) + (0 \times 0.15) + (0 \times 0.1) + (0 \times 0.45)] + 0.7 \times [0.25] = 0.18$**

493

494 Damage level 2: Moderate damage (Replacement cost ratio = 36%)

495 A damage ratio of 10% is assigned to roof and wall according to the damage description “Slight  
496 damages to non-structural components”. A 50% architectural works is applied as the condition  
497 “Possible to be use after moderate reparation”.

498 **Replacement cost ratio =  $0.3 \times [(0.1 \times 0.1) + (0 \times 0.2) + (0 \times 0.15) + (0.1 \times 0.1) + (0 \times 0.45)] + 0.7 \times [0.50] = 0.36$**

499

500 Damage level 3: Major damage (Replacement cost ratio = 54%)

501 A damage ratio of 25% is assigned to roof and wall according to the damage description “Heavy  
502 damages to some walls but no damages in columns”. A 75% architectural works is applied as the  
503 condition “Possible to be use after major reparation”.

504 **Replacement cost ratio =  $0.3 \times [(0.25 \times 0.1) + (0 \times 0.2) + (0 \times 0.15) + (0.25 \times 0.1) + (0 \times 0.45)] + 0.7 \times [0.75] = 0.5$**

505

506 Damage level 4: Complete damage (Replacement cost ratio = 76%)

507 A damage ratio of 50% is assigned to roof and wall and 25% to beam and column according to the  
508 damage description “Heavy damages to several walls and some columns”. A 100% architectural works  
509 is applied as the condition “Possible to be use after a complete reparation and retrofitting”.

510 **Replacement cost ratio**

511 
$$= 0.3 \times [(0.5 \times 0.1) + (0.25 \times 0.2) + (0.25 \times 0.15) + (0.5 \times 0.1) + (0 \times 0.45)] + 0.7 \times [1] = 0.76$$

512

513 Damage level 5: Collapsed (Replacement cost ratio = 100%)

514 A damage ratio of 75% is assigned to roof and wall and 50% to beam and column according to the  
515 damage description “Destructive damage to walls (more than half of wall density) and several columns  
516 (bend or destroyed). However, because a damage ratio of 100% is assigned to footing because of the  
517 damage condition “Non-repairable or great cost for retrofitting”, the final replacement cost ratio is set  
518 to 100%.

519 **Replacement cost ratio**

520 
$$= 0.3 \times [(0.75 \times 0.1) + (0.5 \times 0.2) + (0.5 \times 0.15) + (0.75 \times 0.1) + (1 \times 0.45)] + 0.7 \times [1] = 0.78 \rightarrow 1.00$$

521

522 Damage level 6: Washed away (Replacement cost ratio = 100%)

523 A damage ratio of 100% is assigned to all structural components according to the damage description  
524 “Washed away, only foundation remained, total overturned” and damage condition “Non-repairable,  
525 requires total reconstruction”.

526

## 527 4. Conclusions

528 This study presented a novel quantitative tsunami damage prediction approach, load-resistance analysis.  
529 While previous empirical and experimental studies have vastly improved our understanding of building  
530 response to tsunami impacts and extensively quantified building damage characteristics, implementation  
531 of the resulting damage estimates for future tsunami scenarios is challenging; in particular, when spatial  
532 differences such as construction standards and coastal morphology are significant. Load-resistance  
533 analysis utilizes building design standards to estimate the resistance force of each building, hence  
534 analytically estimate the potential for building damage (collapse) in a localized context. One of the  
535 advantages of load-resistance analysis is it can be extended to other areas where existing empirical  
536 data is sparse, and modified to assess building collapse (sliding or overturning mechanism). This  
537 approach is complementary to published statistical tsunami damage fragility functions as demonstrated  
538 in the case study of Ishinomaki City.

539 To date, building damage characteristics have been treated separately from financial losses which are  
540 often of interest to policy makers and planners. This study is a first attempt to **propose both** building  
541 damage estimations and financial losses. Using the established classification of building damage by  
542 MLIT, building construction costs were evaluated and pegged to each damage level as replacement cost  
543 ratios. The proposed replacement cost index provide an approximate estimate of potential financial  
544 losses in areas where pre-existing disaster-related insurance claim settlements are lacking.

### 545 4.1 Main findings

546 Additional key findings emerging from this study are summarized below:

- 547 - Analytical estimation of the potential for building collapse was calculated using building design  
548 standards and accounting for resistance reduction coefficients, as well as tsunami hydrodynamic  
549 force considering different debris weights. The most general case (resistance reduction coefficient  
550 of 1.0 and 0 ton debris weight) yields the highest accuracy in estimating building collapse in  
551 Ishinomaki city.
- 552 - Sliding alone is an insufficient explanation for building collapse. It is also important to consider  
553 overturning mechanism.
- 554 - This study has confirmed that the use of maximum values for flow depth and velocity might  
555 underestimate damage. Damage is likely to occur before flow depth and velocity reach maximum  
556 values. The present results suggest a flow velocity of 2 m/s or more would trigger collapse for a  
557 typical Japanese 2 story residential wood building

- 558 - The ratio between critical flow velocity and maximum flow velocity might be a useful alternative  
 559 damage intensity measure but needs further investigation – particularly in the light of intermediate  
 560 damage levels.
- 561 - The proposed load-resistance analysis shows higher accuracy in assessing building collapse  
 562 compared to previously developed fragility functions in the same study area.
- 563 - Replacement cost ratio for each level of MLIT damage classification are approximately 18%, 36%,  
 564 54%, 76%, 100% and 100% for damage levels 1, 2, 3, 4, 5 and 6 respectively.

#### 565 **4.2 Future applications and limitations**

566 The newly proposed **load-resistance analytical** method can be applied **to other coastal regions of Japan**  
 567 **and** globally, only where building design standards and related information are known and enforced.  
 568 However, such detailed analyses require higher computational cost and data storage. The proposed  
 569 method may only work in countries where building design codes are strictly followed as in the case of  
 570 Japan and for events generating heavy levels of damage. Additionally, the reliability of building damage  
 571 predictions using this method is dependent on the accuracy of the numerical model. This depends on  
 572 the availability and quality of information regarding the hazard, the dominant damage mode assumed  
 573 in the analysis and/or reference dataset, the assumed debris weight coefficient and the resistance  
 574 reduction coefficient employed. In absence of such information, building damage estimates are  
 575 subjected to significant uncertainty. Therefore, the application of this method is not to produce absolute  
 576 figures for damage estimates, but to be a useful guideline for planning purposes and an alternative study  
 577 for comparison.

578

#### 579 **Acknowledgments**

580 This research was funded by JSPS Grant-in-Aid for Young Scientists (B) “Applying developed fragility  
 581 functions for the Global Tsunami Model (GTM)” (Grant No. 16K16371), JSPS-NRCT Bilateral  
 582 Research grant, Tokio Marine & Nichido Fire Insurance Co., Ltd., Willis Research Network (WRN)  
 583 and the Radchadapisek Sompoch Endowment Fund (2019), Chulalongkorn University (762003-CC).

584

#### 585 **References**

- 586 1) Aida, I. (1978) Reliability of a tsunami source model derived from fault parameters, *J. Phys. Earth*, 26,  
 587 57–73.
- 588 2) Arikawa, T. (2009) Structural behavior under impulsive tsunami loading, *Journal of Disaster Research*,  
 589 4 (6), 377-381.
- 590 3) Attary, N., van de Lindt, J. W., Unnikrishnan, V. U., Barbosa, A. R., and Cox, D. T.: Methodology for  
 591 development of physics-based tsunami fragilities, *Journal of Structural Engineering*, 143 (5), 04016223,  
 592 2017.
- 593 4) Cabinet Office of Japan (2017) Chapter 2: Damage from water-related disasters, 72 p, Available at:  
 594 [http://www.bousai.go.jp/taisaku/pdf/h3003shishin\\_3.pdf](http://www.bousai.go.jp/taisaku/pdf/h3003shishin_3.pdf) (In Japanese) Accessed date: 28/9/2018
- 595 5) Charvet, I., Macabuag, J., and Rossetto, T.: Estimating tsunami induced building damage through  
 596 fragility functions: Critical review and research needs, *Front. Built Environ.*, 3, 1–22,  
 597 <https://doi.org/10.3389/fbuil.2017.00036>, 2017.
- 598 6) Charvet, I., Suppasri, A., Kimura, H., Sugawara, D. and Imamura, F. (2015) Fragility estimations for  
 599 Kesenuma City following the 2011 Great East Japan Tsunami based on maximum flow depths,  
 600 velocities and debris impact, with evaluation of the ordinal model's predictive accuracy, *Natural hazards*,  
 601 79(3), 2073-2099.
- 602 7) Dall’Osso, F., Dominey-Howes, D., Tarbotton, C., Summerhayes, S. and Withycombe, G.: Revision  
 603 and improvement of the PTVA-3 model for assessing tsunami building vulnerability using  
 604 “international expert judgment”: introducing the PTVA-4 model, *Natural Hazards*, 83 (2), 1229-1256,  
 605 2016.
- 606 8) Dias, W.P.S., Yapa, H.D. and Peiris, L.M.N.: Tsunami vulnerability functions from field surveys and  
 607 Monte Carlo simulation, *Civil Engineering and Environmental Systems*, 26 (2), 181-194, 2009.
- 608 9) Federal Emergency Management Agency (FEMA): Tsunami methodology technical manual.,  
 609 Washington,DC, 2013.

- 610 10) Federal Emergency Management Agency (FEMA): Coastal Construction Manual (3 Vols.), 3rd edn.  
611 (FEMA 55) (Jessup, MD, 2003).
- 612 11) Hasegawa, N., Suppasri, A., Makinoshima, F. and Imamura, F. (2018) A proposal of formula for  
613 damage prediction of each building using actual damage data from the 2011 Great East Japan tsunami,  
614 in Proceedings of the Annual Conference of JSCE Tohoku branch, II-97 (in Japanese).
- 615 12) Imamura, F. (1996) Review of tsunami simulation with a finite difference method, in H. Yeh, P. Liu,  
616 and C. E. Synolakis (Eds.), "Long-Wave Runup Models," pp. 25-42, Singapore: World Scientific  
617 Publishing Co., 1996.
- 618 13) Imamura, F., Koshimura, S., Mabuchi, Y., Oie, T. and Okada, K. (2011) Tsunami simulation of the  
619 2011 Great East Japan Tsunami using Tohoku University model (Version 1.1), available at  
620 <http://www.tsunami.civil.tohoku.ac.jp> (In Japanese) (Accessed date: 7 November 2011)
- 621 14) Japan Building Disaster Prevention Association: Seismic evaluation (General evaluation method) Pro  
622 Ver. 3.01, 18 pages, 2012 (In Japanese)
- 623 15) Japan Society of Civil Engineers (JSCE): Tsunami assessment method for nuclear power plants in Japan,  
624 available at: [http://www.jsce.or.jp/committee/ceofnp/Tsunami/eng/JSCE\\_Tsunami\\_060519.pdf](http://www.jsce.or.jp/committee/ceofnp/Tsunami/eng/JSCE_Tsunami_060519.pdf)  
625 (Accessed date: 6 August 2016)
- 626 16) Japan Society of Material Cycles and Waste Management, Disaster Waste Countermeasure and  
627 Reconstruction Task Team: Disaster waste classification and treatment strategy manual Version 2, the  
628 last update on 15 June 2011, available at <http://eprc.kyoto-u.ac.jp/saigai/report/2011/04/001407.html>  
629 (Accessed date: 14 February 2018) (In Japanese)
- 630 17) Japan Wood-Products Information and Research Center (2019) O&A on utilization of wooden materials,  
631 Available at: <http://www.jawic.or.jp/qanda/index.php?no=19> (In Japanese) Accessed date: 28/9/2018
- 632 18) Kelman, I., & Spence, R. (2004). An overview of flood actions on buildings. *Engineering*  
633 *Geology*, 73(3-4), 297-309.
- 634 19) Koshimura, S., Oie, T., Yanagisawa, H., and Imamura, F.: Developing Fragility Functions for Tsunami  
635 Damage Estimation using Numerical Model and Post-Tsunami Data from Banda Aceh, Indonesia,  
636 *Coast. Eng. J.*, 51, 243–273, 2009.
- 637 20) Latcharote, P., Suppasri, A., Yamashita, A., Adriano, B., Koshimura, S., Kai, Y. and Imamura, F.  
638 (2017) Possible Failure Mechanism of Buildings Overturned during the 2011 Great East Japan Tsunami  
639 in the Town of Onagawa, *Frontiers in Built Environment, Earthquake Engineering, Mega Quakes:*  
640 *Cascading Earthquake Hazards and Compounding Risks*, 3 (16), 1-18
- 641 21) Leelawat, N., Suppasri, A., Charvet, I. and Imamura, F. (2014) Building damage from the 2011 Great  
642 East Japan tsunami: Quantitative assessment of influential factors - A new perspective on building  
643 damage analysis, *Natural Hazards*, 73 (2), 449-471.
- 644 22) Macabuag, J., Rossetto, T., Ioannou, I. and Eames, I. (2018) Investigation of the effect of debris-  
645 induced damage for constructing tsunami fragility curves for building, *Geosciences* 2018, 8(4),  
646 117.
- 647 23) Macabuag, J., Rossetto, T., Ioannou, I., Suppasri, A., Sugawara, D., Adriano, B., Imamura, F. and  
648 Koshimura, S. (2016) A proposed methodology for deriving tsunami fragility functions for buildings  
649 using optimum intensity measures, *Natural Hazards*, 84 (2), 1257-1285.
- 650 24) Macabuag J, Rossetto T and Lloyd T (2014) Sensitivity analysis of a framed structure under several  
651 tsunami design-guidance loading regimes. 2<sup>nd</sup> European Conference on Earthquake Engineering  
652 and Seismology, Istanbul, Turkey.
- 653 25) Matsutomi, H. and Harada, K.: Tsunami-trace distribution around building and its practical use, in:  
654 Proceedings of the 3rd International tsunami field symposium, Sendai, Japan, 10–11 April 2010, session  
655 3–2, 2010.
- 656 26) MN Housing and Building Laboratory (2015) Wooden house cost simulation Available at:  
657 <http://mnsekkei-cost.blogspot.com/> (In Japanese) Accessed date: 28/9/2018
- 658 27) Mori, N., Takahashi, T. and 2011 Tohoku Earthquake Tsunami Joint Survey Group (2012) Nationwide  
659 Post Event Survey and Analysis of the 2011 Tohoku Earthquake Tsunami, *Coastal Engineering Journal*,  
660 54, 1250001.
- 661 28) Ministry of Land, Infrastructure, Transportation and Tourism (MLIT): Reconstruction Support  
662 Survey Archive: <http://fukkou.csis.u-tokyo.ac.jp/> (Accessed date: 4 July 2012) (In Japanese)
- 663 29) Ministry of Land, Infrastructure, Transportation and Tourism (MLIT), Article 46 Enforcement  
664 Ordinance of Building Standard Law:  
665 <http://elaws.e->

- 666 gov.go.jp/search/elawsSearch/elaws\_search/lsg0500/detail?lawId=325CO0000000338#390  
667 (Accessed date: 15 January 2018) (In Japanese)
- 668 30) Nadal, N. C., Zapata, R. E., Pagán, I., López, R., & Agudelo, J. (2009). Building damage due to  
669 riverine and coastal floods. *Journal of Water Resources Planning and Management*, 136(3), 327-  
670 336.
- 671 31) Nanayakkara, K. and Dias, W.: Fragility curves for structures under tsunami loading, *Natural*  
672 *Hazards*, 80 (1), 471-486, 2016.
- 673 32) Omira, R., Baptista, M. A., Miranda, J. M., Toto, E., Catita, C., & Catalão, J. (2010). Tsunami  
674 vulnerability assessment of Casablanca Morocco using numerical modelling and GIS tools. *Natural*  
675 *Hazards and Earth Systems Sciences*, 54, 75–95.
- 676 33) Peiris, N.: Vulnerability functions for tsunami loss estimation, The 1<sup>st</sup> European Conference on  
677 Earthquake Engineering and Seismology, Geneva, Switzerland, 3-8 September 2006, Paper no.  
678 1121, 10 pages.
- 679 34) Reese, S., Cousins, W. J., Power, W. L., Palmer, N. G., Tejakusuma, I. G., & Nugrahadi, S.:  
680 Tsunami vulnerability of buildings and people in South Java? Field observations after the July 2006  
681 Java tsunami. *Natural Hazards and Earth Systems Sciences*, 7, 573–589, 2007.
- 682 35) Shoji, G. and Nakamura, T.: Damage assessment of road bridges subjected to the 2011 Tohoku  
683 Pacific earthquake tsunami, *Journal of Disaster Research*, 12, 79–89, 2017.
- 684 36) Song, J., De Risi, R. and Goda, K. (2017) Influence of flow velocity on tsunami loss estimation,  
685 *Geosciences* 2017, 7(4), 114.
- 686 37) Suppasri, A., Fukui, K., Yamashita, K., Leelawat, N., Ohira, H., and Imamura, F.: Developing  
687 fragility functions for aquaculture rafts and eelgrass in the case of the 2011 Great East Japan  
688 tsunami, *Nat. Hazards Earth Syst. Sci.*, 18, 145-155, <https://doi.org/10.5194/nhess-18-145-2018>,  
689 2018.
- 690 38) Suppasri, A., Latcharote, P., Bricker, J. D., Leelawat, N., Hayashi, A., Yamashita, K.,  
691 Makinoshima, F., Roeber, V., and Imamura, F.: Improvement of tsunami countermeasures based  
692 on lessons from the 2011 great east japan earthquake and tsunami-Situation after five years-, *Coast.*  
693 *Eng. J.*, 58, 1640011, <https://doi.org/10.1142/S0578563416400118>, 2016
- 694 39) Suppasri, A., Charvet, I., Imai, K. and Imamura, F.: Fragility curves based on data from the 2011  
695 Great East Japan tsunami in Ishinomaki city with discussion of parameters influencing building  
696 damage, *Earthquake Spectra*, Vol. 31, No. 2, 841-868, 2015.
- 697 40) Suppasri, A., Muhari, A., Futami, T., Imamura, F., and Shuto, N.: Loss functions of small marine  
698 vessels based on surveyed data and numerical simulation of the 2011 Great East Japan tsunami, *J.*  
699 *Waterway, Port, Coastal, Ocean Eng.*, 140, 04014018, [https://doi.org/10.1061/\(ASCE\)WW.1943-  
700 5460.0000244](https://doi.org/10.1061/(ASCE)WW.1943-5460.0000244), 2014.
- 701 41) Suppasri, A., Koshimura, S., and Imamura, F.: Developing tsunami fragility curves based on the  
702 satellite remote sensing and the numerical modeling of the 2004 Indian Ocean tsunami in Thailand,  
703 *Nat. Hazards Earth Syst. Sci.*, 11, 173–189, <https://doi.org/10.5194/nhess-11-173-2011>, 2011.
- 704 42) Valencia, N., Gardi, A., Gauraz, A., Leone, F., & Guillande, R. (2011). New tsunami damage  
705 functions developed in the framework of SCHEMA project: Application to European-  
706 Mediterranean coasts. *Natural Hazards and Earth Systems Sciences*, 11, 2835–2846.
- 707 43) Triantafyllou, I., Novikova, T., Charalampakis, M., Fokaefs, A. and Papadopoulos, G. A. (2018)  
708 Quantitative Tsunami Risk Assessment in Terms of Building Replacement Cost Based on Tsunami  
709 Modelling and GIS Methods: The Case of Crete Isl., *Hellenic Arc, Pure and Applied Geophysics*  
710 (Published online)
- 711 44) Yeh, H., Barbosa, A. R., Ko, H., & Cawley, J. G. (2014). Tsunami loadings on structures: Review  
712 and analysis. *Coastal Engineering Proceedings*, 1(34), 4.
- 713 45) Yokohama City, Housing and Architecture Bureau: Standard weight table of wooden house and  
714 standard weight table calculation basis of wooden house available at  
715 <http://www.city.yokohama.lg.jp/kenchiku/shidou/shidou/toriatukai/gakeue/siryous3.pdf> (Accessed  
716 date: 21 February 2018) (In Japanese)
- 717
